# Supplementary material for: Structure and luminescence characteristics of self-activated vanadate garnet phosphors
Source: Royal Society of Chemistry journal article supplement (doi:10.1039/d4cp03074e), 2024-01-01
Supplement: d4cp03074e1.pdf [file d4cp03074e1.pdf]

## Supporting Information

### Structure and Luminescence Characteristics of Self-activated Vanadate Garnet

#### Phosphors

Jing Xie <sup>1,2</sup>, Yue Zhong <sup>1</sup>, Tao Su <sup>1</sup>, Wenming Wang <sup>1</sup>, Yan Pan <sup>3</sup>, Xiantao Wei <sup>4\*</sup>,

Yong Li <sup>1,2\*</sup>

1. *School of Microelectronics & Data Science, Anhui University of Technology, Maanshan 243000, China*

2. *Anhui Research Center of Generic Technology in New Display Industry, Hefei 230009, PR China*

3. *Analysis and Testing Central Facility, Anhui University of Technology, Maanshan 243000, China.*

4. *Physics Experiment Teaching Center, School of Physical Sciences, University of Science and Technology of  
China, Hefei 230026, China*

\*Email: [yongli@ahut.edu.cn](mailto:yongli@ahut.edu.cn); \*Email: [wxt@ustc.edu.cn](mailto:wxt@ustc.edu.cn);

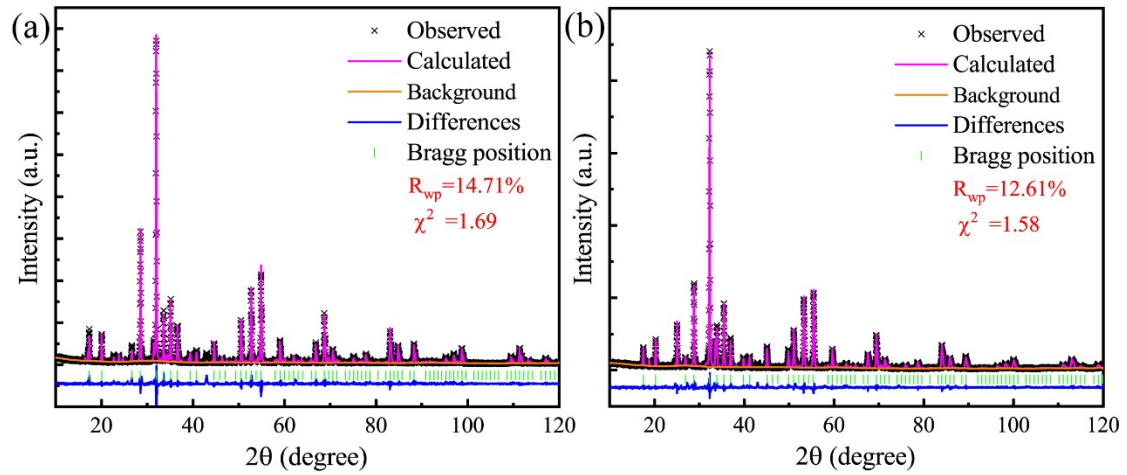

Fig. S1 (a) Rietveld refinement patterns of  $\text{KCa}_2\text{Mg}_2\text{V}_3\text{O}_{12}$  samples. (b) Rietveld refinement patterns of  $\text{Na}_2\text{YMg}_2\text{V}_3\text{O}_{12}$  samples.

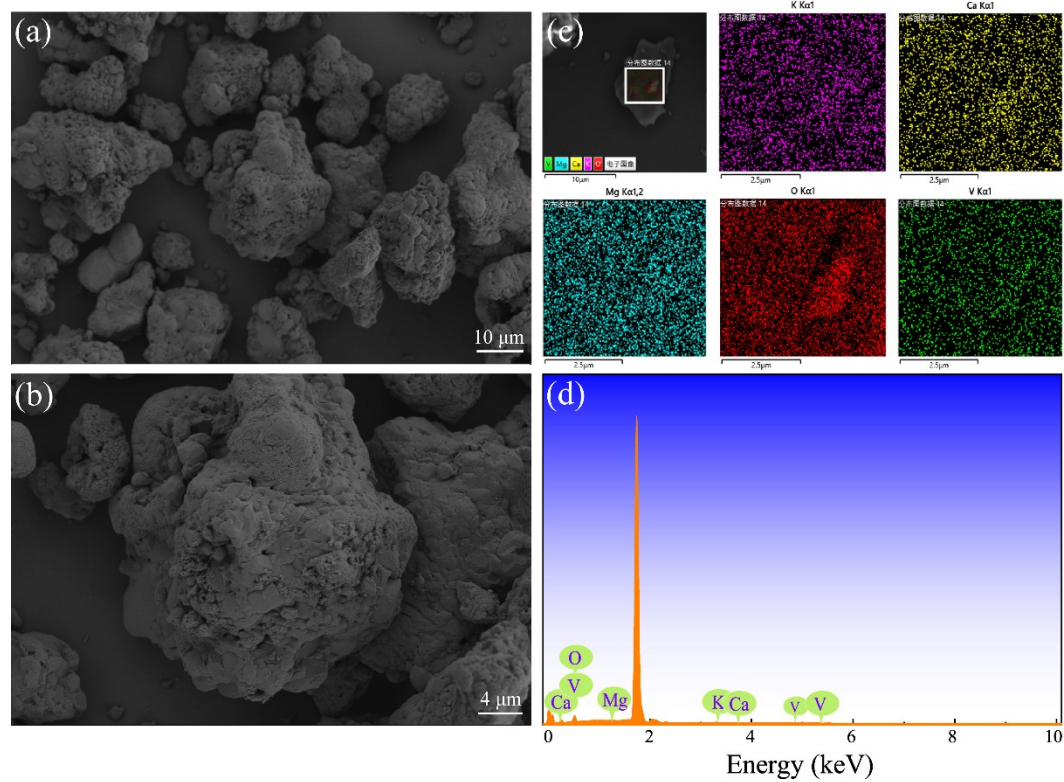

Fig. S2 (a-b) SEM images of  $\text{KCa}_2\text{Mg}_2\text{V}_3\text{O}_{12}$  sample at different magnifications, (c) and (d) elemental mapping and EDS spectrum of the sample.

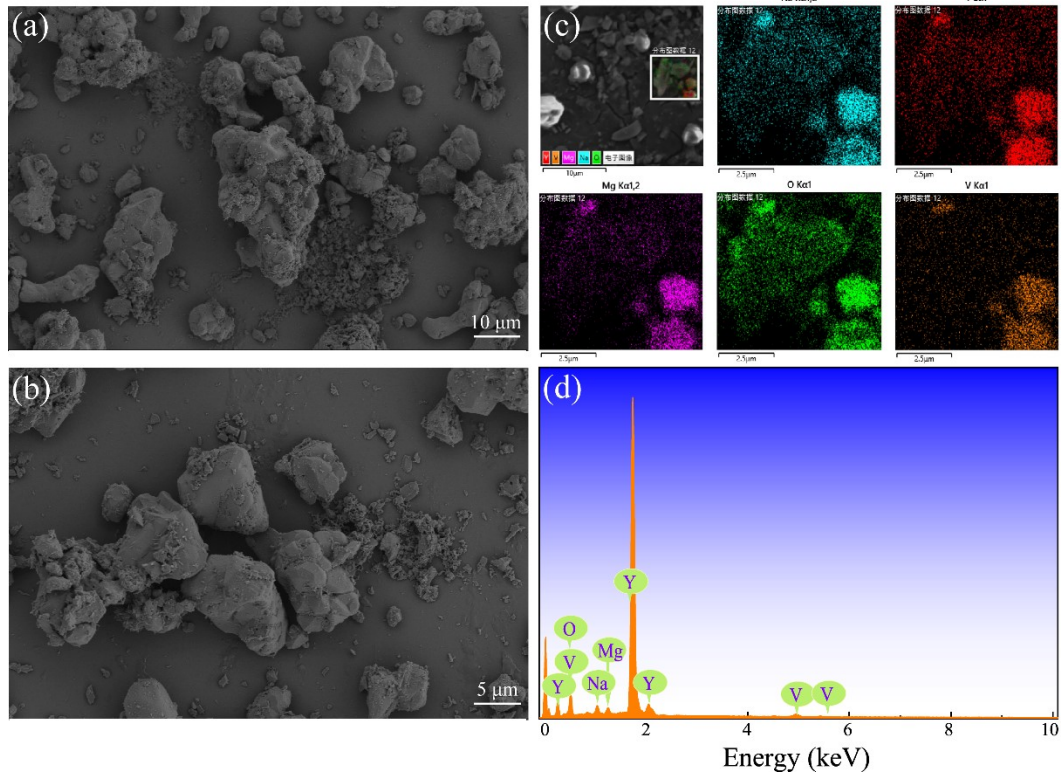

Fig. S3 (a-b) SEM images of  $\text{Na}_2\text{YMg}_2\text{V}_3\text{O}_{12}$  sample at different magnifications, (c) and (d) elemental mapping and EDS spectrum of the sample.

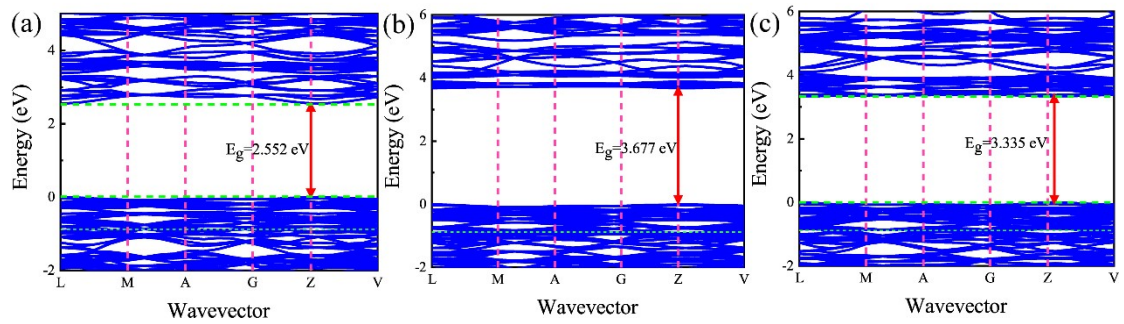

Fig. S4 Calculation of the energy band structure of  $\text{NaSr}_2\text{Mg}_2\text{V}_3\text{O}_{12}$ ,  $\text{KCa}_2\text{Mg}_2\text{V}_3\text{O}_{12}$ , and  $\text{Na}_2\text{YMg}_2\text{V}_3\text{O}_{12}$  samples.

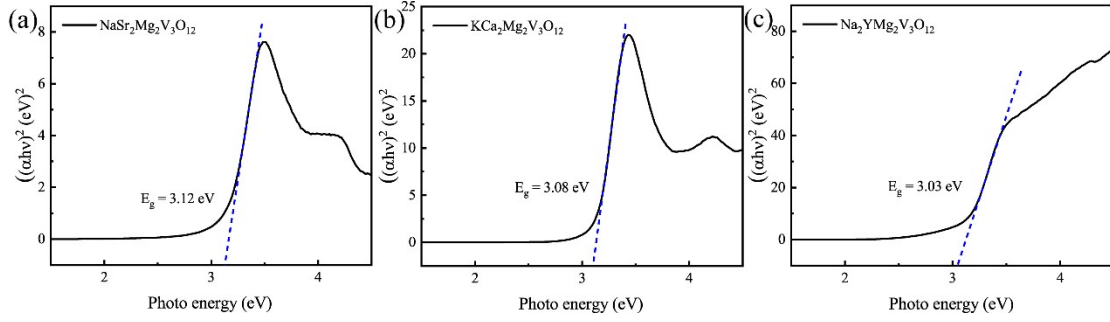

Fig. S5 Tauc plot of the  $\text{NaSr}_2\text{Mg}_2\text{V}_3\text{O}_{12}$ ,  $\text{KCa}_2\text{Mg}_2\text{V}_3\text{O}_{12}$ , and  $\text{Na}_2\text{YMg}_2\text{V}_3\text{O}_{12}$  matrix fitted from the absorption spectrum.

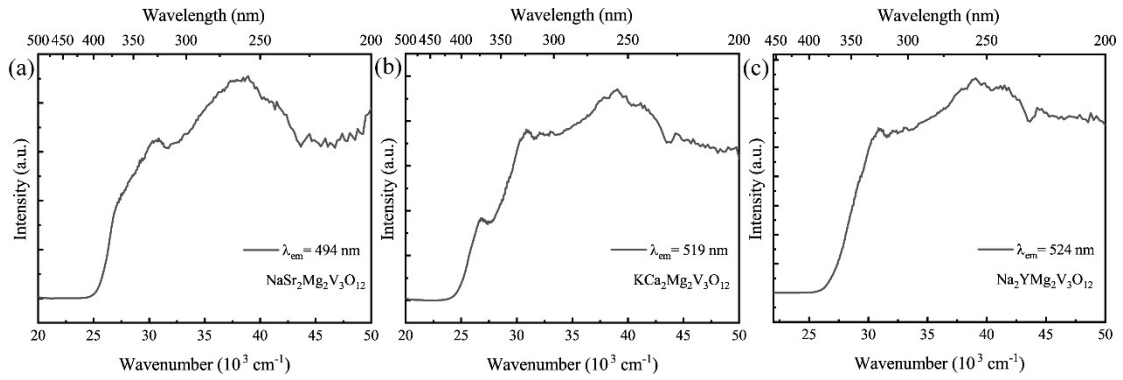

Fig. S6 PLE spectrum of  $\text{NaSr}_2\text{Mg}_2\text{V}_3\text{O}_{12}$ ,  $\text{KCa}_2\text{Mg}_2\text{V}_3\text{O}_{12}$ , and  $\text{Na}_2\text{YMg}_2\text{V}_3\text{O}_{12}$  samples.

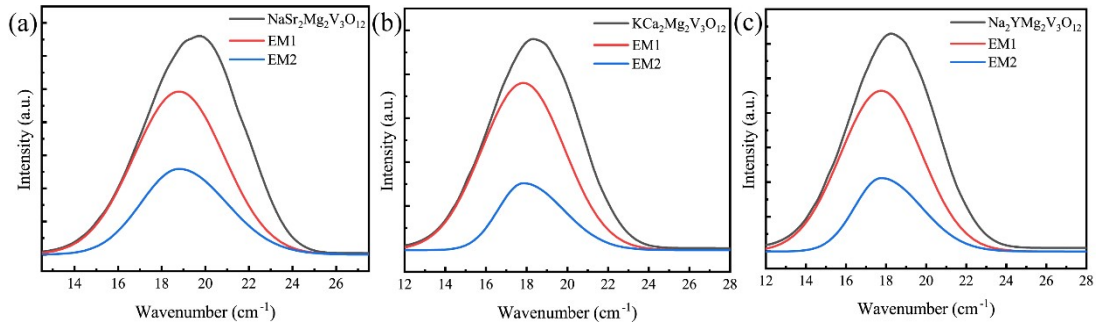

Fig. S7 Gauss deconvolutions of the PL spectra of the  $\text{NaSr}_2\text{Mg}_2\text{V}_3\text{O}_{12}$ ,  $\text{KCa}_2\text{Mg}_2\text{V}_3\text{O}_{12}$ , and  $\text{Na}_2\text{YMg}_2\text{V}_3\text{O}_{12}$  phosphors excited at 266 nm

Table. S1 The lifetime of the  $\text{NaSr}_2\text{Mg}_2\text{V}_3\text{O}_{12}$ ,  $\text{KCa}_2\text{Mg}_2\text{V}_3\text{O}_{12}$ , and  $\text{Na}_2\text{YMg}_2\text{V}_3\text{O}_{12}$  phosphor with 355 nm and 266 nm excitation.

| Phosphor                                          | Lifetime ( $\mu\text{s}$ ) |        |
|---------------------------------------------------|----------------------------|--------|
|                                                   | 355 nm                     | 266 nm |
| $\text{NaSr}_2\text{Mg}_2\text{V}_3\text{O}_{12}$ | 7.67                       | 6.15   |
| $\text{KCa}_2\text{Mg}_2\text{V}_3\text{O}_{12}$  | 5.81                       | 5.72   |
| $\text{Na}_2\text{YMg}_2\text{V}_3\text{O}_{12}$  | 2.48                       | 2.06   |

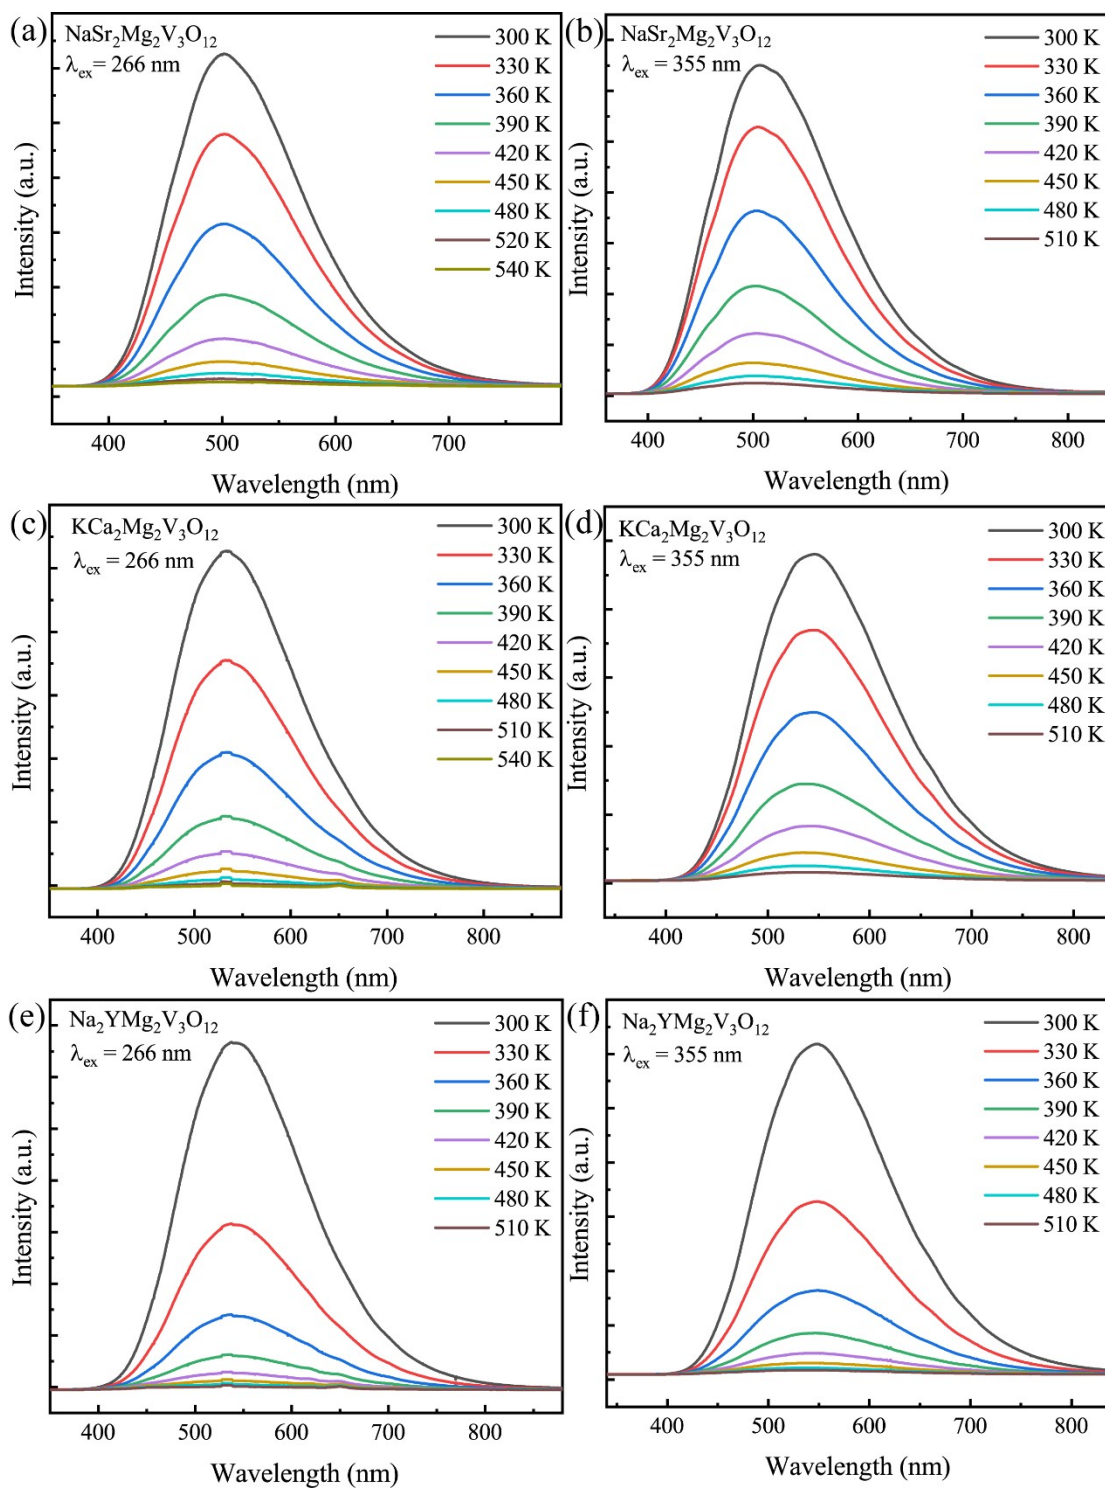

Fig. S8 (a-b) Temperature-dependence of the PL intensity of the  $\text{NaSr}_2\text{Mg}_2\text{V}_3\text{O}_{12}$  phosphors. (c-d) Temperature-dependence of the PL intensity of the  $\text{KCa}_2\text{Mg}_2\text{V}_3\text{O}_{12}$  phosphors. (e-f) Temperature-dependence of the PL intensity of the  $\text{Na}_2\text{YMg}_2\text{V}_3\text{O}_{12}$  phosphors.

Table S2 The normalized luminescence integral intensities of the samples at different temperatures.

| Temperatur | $\text{NaSr}_2\text{Mg}_2\text{V}_3\text{O}_{12}$ | $\text{KCa}_2\text{Mg}_2\text{V}_3\text{O}_{12}$ | $\text{Na}_2\text{YMg}_2\text{V}_3\text{O}_{12}$ |
|------------|---------------------------------------------------|--------------------------------------------------|--------------------------------------------------|
|------------|---------------------------------------------------|--------------------------------------------------|--------------------------------------------------|



| e     | 266 nm  | 355 nm  | 266 nm  | 355 nm  | 266 nm  | 355 nm  |
|-------|---------|---------|---------|---------|---------|---------|
| 300 K | 1       | 1       | 1       | 1       | 1       | 1       |
| 330 K | 0.76860 | 0.80439 | 0.68256 | 0.77639 | 0.48598 | 0.53496 |
| 360 K | 0.50239 | 0.55139 | 0.40818 | 0.52230 | 0.22371 | 0.26556 |
| 390 K | 0.28761 | 0.32742 | 0.21842 | 0.30619 | 0.10612 | 0.13302 |
| 420 K | 0.15207 | 0.18628 | 0.11058 | 0.17390 | 0.05425 | 0.06989 |
| 450 K | 0.08057 | 0.09794 | 0.05679 | 0.08938 | 0.03084 | 0.03917 |
| 480 K | 0.04354 | 0.05676 | 0.03055 | 0.04831 | 0.01886 | 0.02335 |
| 510 K | 0.02490 | 0.03405 | 0.01777 | 0.02765 | 0.01886 | 0.01566 |

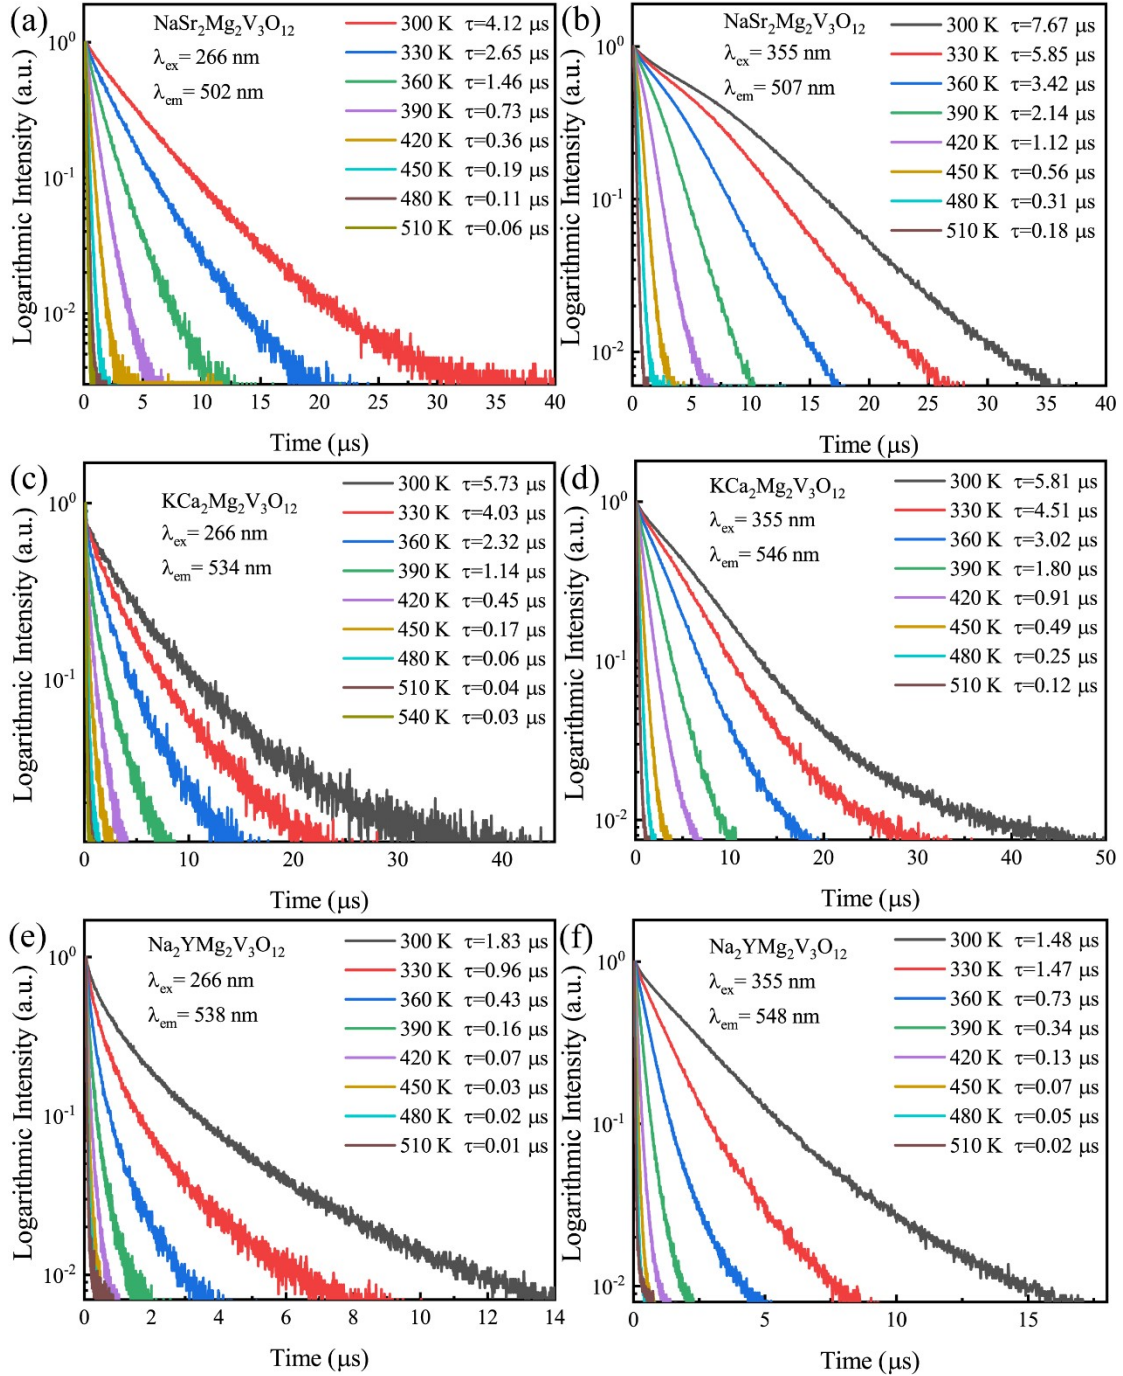

Fig. S9 The decay curves of red emission in  $\text{NaSr}_2\text{Mg}_2\text{V}_3\text{O}_{12}$ ,  $\text{KCa}_2\text{Mg}_2\text{V}_3\text{O}_{12}$ , and  $\text{Na}_2\text{YMg}_2\text{V}_3\text{O}_{12}$  phosphors at different temperatures (300-510 K)

Table. S3 The lifetime of the  $\text{NaSr}_2\text{Mg}_2\text{V}_3\text{O}_{12}$ ,  $\text{KCa}_2\text{Mg}_2\text{V}_3\text{O}_{12}$ , and  $\text{Na}_2\text{YMg}_2\text{V}_3\text{O}_{12}$  phosphor at different temperatures.

| Temperature<br>e | Lifetime ( $\mu\text{s}$ )                        |        |                                                  |        |                                                  |        |
|------------------|---------------------------------------------------|--------|--------------------------------------------------|--------|--------------------------------------------------|--------|
|                  | $\text{NaSr}_2\text{Mg}_2\text{V}_3\text{O}_{12}$ |        | $\text{KCa}_2\text{Mg}_2\text{V}_3\text{O}_{12}$ |        | $\text{Na}_2\text{YMg}_2\text{V}_3\text{O}_{12}$ |        |
|                  | 266 nm                                            | 355 nm | 266 nm                                           | 355 nm | 266 nm                                           | 355 nm |
| 300 K            | 4.120                                             | 7.666  | 5.725                                            | 5.815  | 1.834                                            | 2.481  |
| 330 K            | 2.648                                             | 5.854  | 4.027                                            | 4.508  | 0.956                                            | 1.467  |
| 360 K            | 1.464                                             | 3.420  | 2.317                                            | 3.024  | 0.428                                            | 0.732  |
| 390 K            | 0.726                                             | 2.135  | 1.141                                            | 1.799  | 0.161                                            | 0.341  |
| 420 K            | 0.364                                             | 1.124  | 0.455                                            | 0.914  | 0.069                                            | 0.131  |
| 450 K            | 0.188                                             | 0.564  | 0.166                                            | 0.486  | 0.026                                            | 0.072  |
| 480 K            | 0.106                                             | 0.312  | 0.062                                            | 0.246  | 0.017                                            | 0.053  |
| 510 K            | 0.059                                             | 0.184  | 0.037                                            | 0.120  | 0.012                                            | 0.023  |

Table S4 Absorption Rates, Internal QE, and External QE of the  $\text{NaSr}_2\text{Mg}_2\text{V}_3\text{O}_{12}$ ,  $\text{KCa}_2\text{Mg}_2\text{V}_3\text{O}_{12}$ , and  $\text{Na}_2\text{YMg}_2\text{V}_3\text{O}_{12}$  Phosphors excited at 324 nm.

| Phosphors                                         | Absorption rate (%) | QE           |              |
|---------------------------------------------------|---------------------|--------------|--------------|
|                                                   |                     | Internal (%) | External (%) |
| $\text{NaSr}_2\text{Mg}_2\text{V}_3\text{O}_{12}$ | 72.2                | 84.5         | 61.0         |
| $\text{KCa}_2\text{Mg}_2\text{V}_3\text{O}_{12}$  | 72.1                | 85.5         | 61.6         |
| $\text{Na}_2\text{YMg}_2\text{V}_3\text{O}_{12}$  | 74.7                | 16.4         | 12.3         |

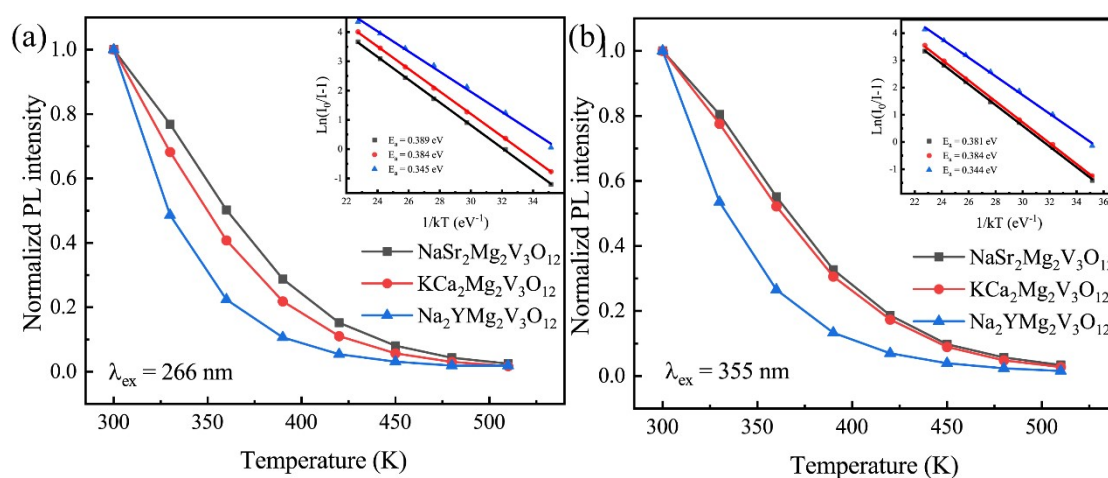

Fig. S10 Temperature-dependence of the PL intensity of the NSM, KCM, and NYM phosphors under excitation at (a) 355 nm and (b) 266 nm. Insert shows the calculated activation energy for thermal quenching.

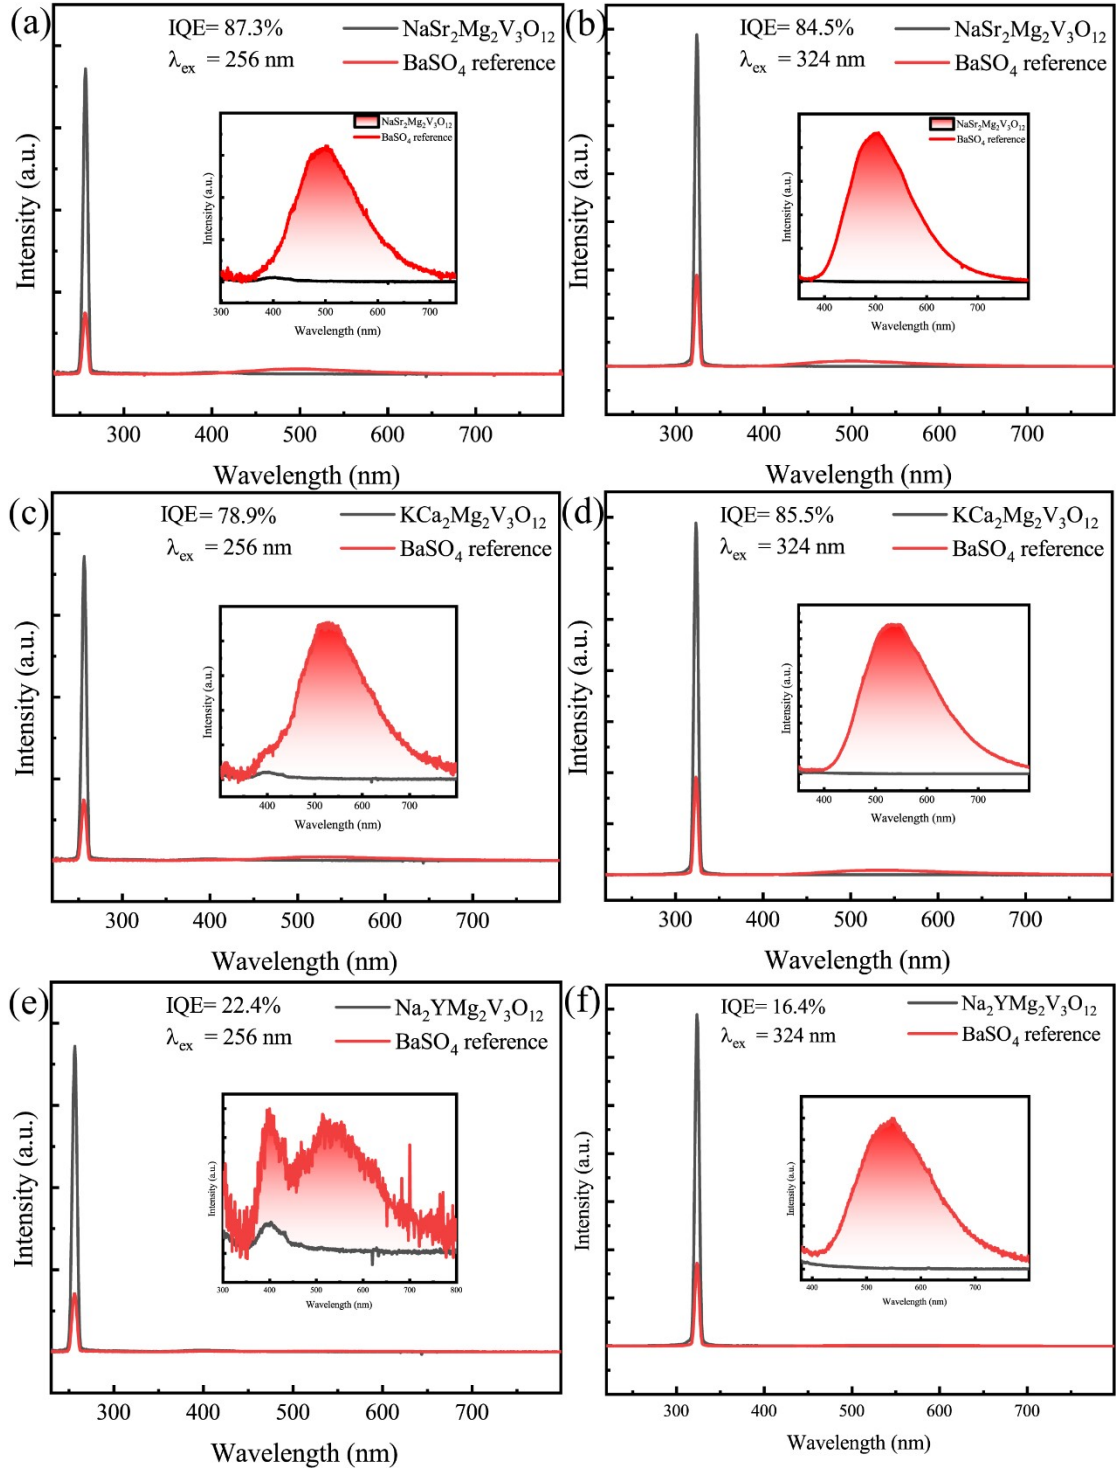

Fig. S11 (a,b) The IQE map of the NaSr<sub>2</sub>Mg<sub>2</sub>V<sub>3</sub>O<sub>12</sub> sample. (c,d) The IQE map of the KCa<sub>2</sub>Mg<sub>2</sub>V<sub>3</sub>O<sub>12</sub> sample. (e,f) The IQE map of the Na<sub>2</sub>YMg<sub>2</sub>V<sub>3</sub>O<sub>12</sub> sample.
